# Supplementary material for: PARP inhibitors in breast and ovarian cancer with BRCA mutations: a meta-analysis of survival
Source: publisher site journal article supplement (doi:10.18632/aging.202724), 2021-03-11
Supplement: Supplementary file [file aging-v13i6-202724-supplementary-material-SD1.pdf]

**SUPPLEMENTARY FIGURES**

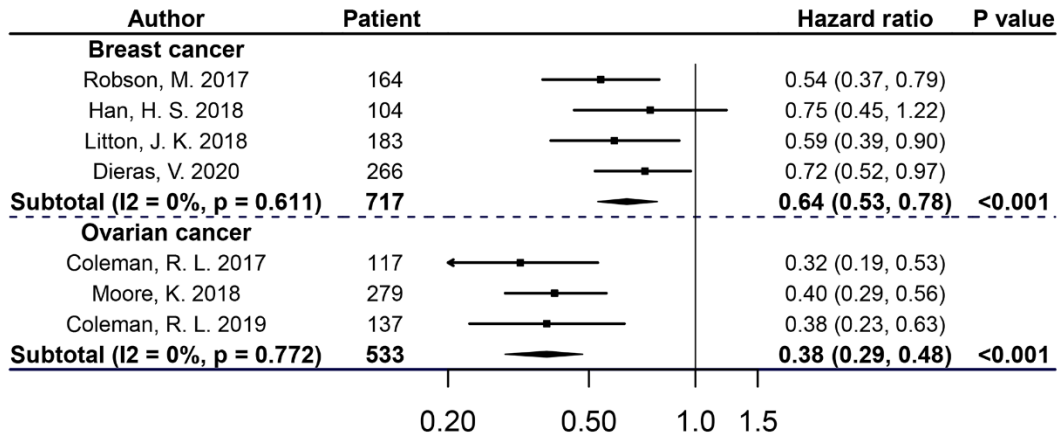

Supplementary Figure 1. PFS of breast or ovarian cancer patients with BRCAm1 treated with PARPis.

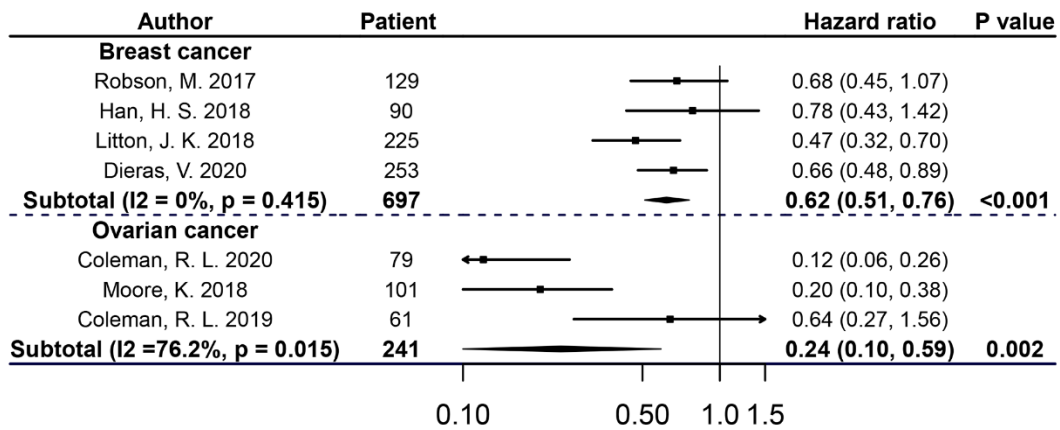

Supplementary Figure 2. PFS of breast or ovarian cancer patients with BRCAm2 treated with PARPis.

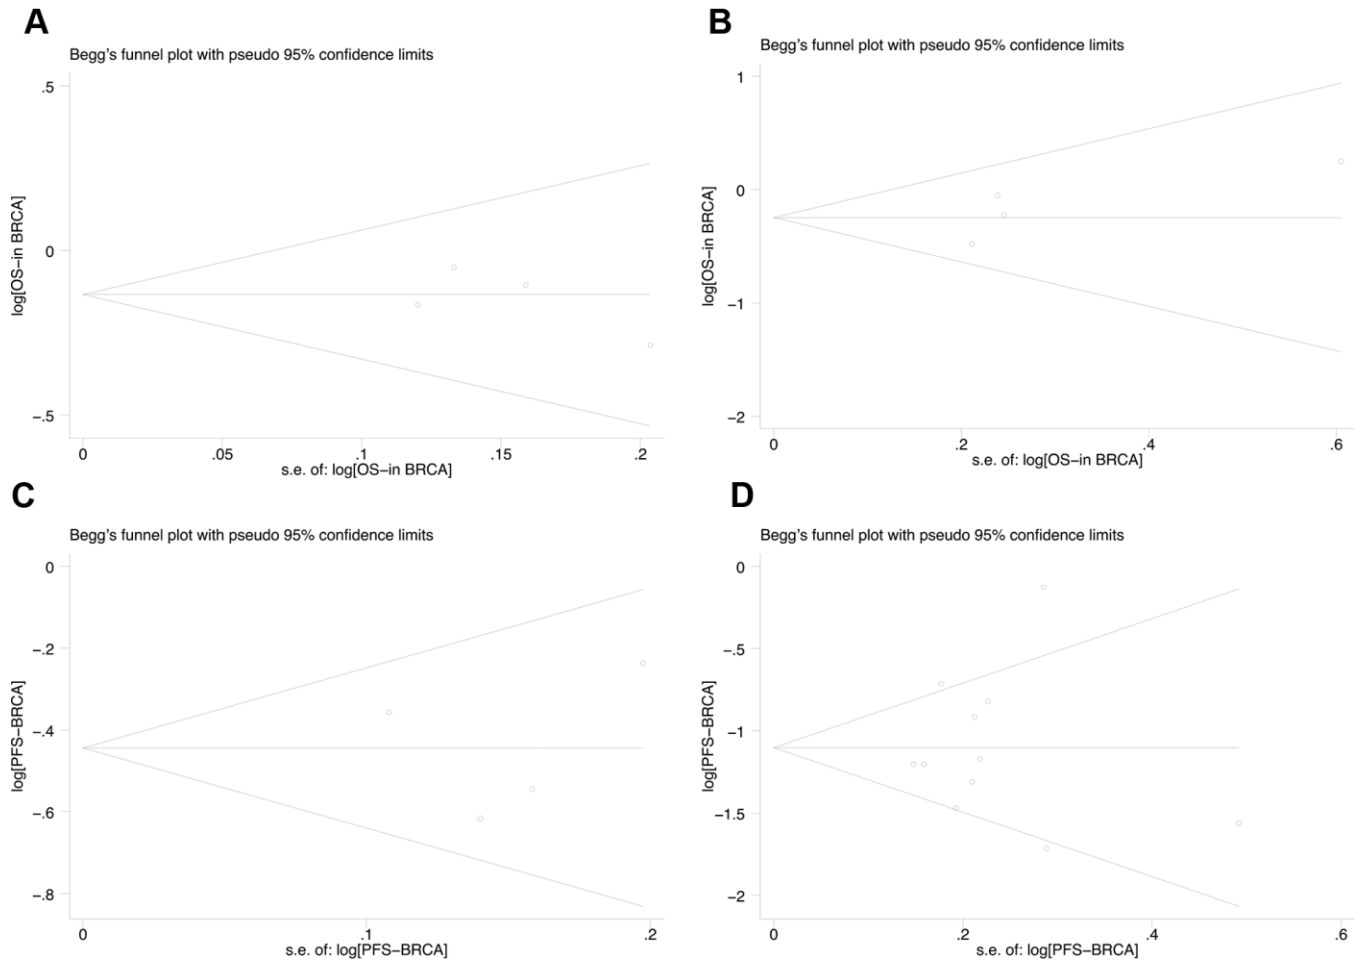

**Supplementary Figure 3.** Begg's funnel plot for publication bias test for survival of breast cancer group (A, C) and ovarian cancer group (B, D) with BRCAm.
